# Supplementary material for: The Effect of Kuchala (Arum Korolkowii Regel, 1873) Tuber Tincture to Increase of the Serum Testosterone in the Adult Male Guinea Pigs (Cavia Porcellus Linnaeus, 1758)
Source: Research Square preprint supplement (doi:10.21203/rs.3.rs-133900/v1), 2021-01-07
Supplement: Supplementary file 2 [file d3808ebfb06c10219825c7f6.xlsx]

## Sheet:  Control Group
		Control Group
Parameters	K1	K2	K3	K4	K5	K6	K7	K8	K9	K10	Mean	SD	SE	Median	Min	Max
WLC (x109/L)	5.5	6.8	8.3	7.8	9.1	5.9	7.9	6.9	7.3	6.9	7.24	1.08444	0.342929	7.1	5.5	9.1
Neutrophils (NEU %)	48	53	52	53	61	49	57	57	55	51	53.6	3.97772	1.25786	53	48	61
Lymphocytes (LIM %)	43	41	37	39	35	42	37	37	41	42	39.4	2.75681	0.87178	40	35	43
Monocytes (MON %)	5	4	5	5	4	5	7	5	4	4	4.8	0.918937	0.290593	5	4	7
Eosinophils (EOS %)	4	2	3	0	3	3	1	0	4	4	2.4	1.57762	0.498888	3	0	4
Basophils (BAS %)	0	0	1	0	0	1	1	0	0	1	0.4	0.516398	0.163299	0	0	1
Erythrocytes (RBC x1012/L)	4.9	4.1	4.8	4.2	4.9	4.6	3.9	4.7	4.6	4.6	4.53	0.34657	0.109595	4.6	3.9	4.9
Hemoglobin(xG/L)	147	145	148	142	146	141	144	147	146	139	144.5	2.95334	0.933928	145.5	139	148
Hematocrit (HCT %)	44	42	45	44	43	42	45	44	43	44	43.6	1.07497	0.339935	44	42	45
MCV (fL)	70	77	80	77	73	76	79	72	81	81	76.6	3.86437	1.22202	77	70	81
MCH (pg)	21.9	22.9	26.1	23.2	25.1	23.6	25.9	24.8	22.9	26.3	24.27	1.56564	0.495098	24.2	21.9	26.3
MCHC(g/dL)	30.9	31.3	33.3	32.1	32.9	31.8	32.5	32.4	33.1	33.3	32.36	0.834266	0.263818	32.45	30.9	33.3
Color indicator	0.9	0.88	0.87	0.85	0.89	0.89	0.87	0.9	0.88	0.83	0.876	0.0222111	0.00702377	0.88	0.83	0.9
Erythrocyte sedimentation rate (x mm/hour)	3	3	3	2	2	2	2	3	3	3	2.6	0.516398	0.163299	3	2	3
Platelets (PLTx109/L)	310	309	308	293	289	307	299	297	299	308	301.9	7.47514	2.36385	303	289	310
Mean platelet volume (fL)	7.4	7.3	7.5	7.4	7.4	7.5	7.3	7.4	7.4	7.7	7.43	0.11595	0.0366667	7.4	7.3	7.7
Биохимия
ALT (U/L)	63.4	64.7	64.6	63.9	65.4	65.1	61.3	62.5	64.9	60.7	63.65	1.64671	0.520737	64.25	60.7	65.4
AST (U/L)	58.2	80.9	78.6	79.2	90.9	86.9	83.5	85.1	69.3	70.3	78.29	9.79041	3.096	80.05	58.2	90.9
Glucose (mmol/L)	6.91	7.9	11.3	10.6	13.5	11.4	7.99	9.33	9.67	10.17	9.877	1.96338	0.620874	9.92	6.91	13.5
Testosterone (nmol/L)	9.33	9.86	9.98	9.62	10.4	8.97	10.1	8.83	9.61	8.63	9.533	0.58321	0.184427	9.615	8.63	10.4

## Sheet: Experimental Group
Experimental Group
Parameters	E1	E2	E3	E4	E5	E6	E7	E8	E9	E10	E11	E12	Mean	SD	SE	Median	Min	Max
WLC (x109/L)	4	11	15.2	12.3	7.7	6.3	9	5.2	4.8	5.9	9.1	4.8	7.94167	3.47993	1.00457	7	4	15.2
Neutrophils (NEU %)	39	46	14	27	32	27	21	20	17	25	31	26	27.0833	9.07001	2.61829	26.5	14	46
Lymphocytes (LIM %)	50	40	70	71	46	64	61	52	66	44	48	61	56.0833	10.6639	3.07842	56.5	40	71
Monocytes (MON %)	11	4	8	2	2	3	3	2	2	5	4	9	4.58333	3.08835	0.891529	3.5	2	11
Eosinophils (EOS %)	0	10	8	0	20	0	2	3	5	3	6	8	5.41667	5.71216	1.64896	4	0	20
Basophils (BAS %)	0	0	0	0	0	0	0	0	0	0	0	1	0.0833333	0.288675	0.0833333	0	0	1
Erythrocytes (RBC x1012/L)	5.4	5.6	5.5	5.3	5.3	5.4	5.3	5.3	5.4	5.4	5.3	5.3	5.375	0.0965307	0.027866	5.35	5.3	5.6
Hemoglobin (g/L)	156	158	160	154	147	159	149	153	152	155	158	154	154.583	3.96481	1.14454	154.5	147	160
Hematocrit (HCT %)	44.4	44.4	48	46	44	44.2	44.1	47.1	45.6	44.9	45.3	46	45.3333	1.26874	0.366253	45.1	44	48
MCV (fL)	73.1	73	70.4	75.6	84.2	74.1	75.3	73.9	73.6	74.9	73.5	73.7	74.6083	3.30219	0.953261	73.8	70.4	84.2
MCH (pg)	25.7	26	34.4	95.5	63.3	72.6	51.1	44.9	73.9	49.3	58.1	51.9	53.8917	20.5695	5.9379	51.5	25.7	95.5
MCHC(g/dL)	352	355	1910	1262	752	698	672	456	421	369	968	819	752.833	459.544	132.659	685	352	1910
Color indicator	0.86	0.84	0.87	0.87	0.83	0.85	0.84	0.86	0.87	0.85	0.86	0.84	0.853333	0.0137069	0.00395684	0.855	0.83	0.87
Erythrocyte sedimentation rate (x mm/hour)	2	3	2	2	2	2	2	2	3	3	2	2	2.25	0.452267	0.130558	2	2	3
Platelets (PLTx109/L)	429	494	235	288	390	289	261	403	369	352	293	319	343.5	76.3753	22.0476	335.5	235	494
Mean platelet volume (fL)	3.2	3.1	4.9	6	5.9	3.3	5.1	4.9	4.6	3.7	5.6	4.7	4.58333	1.03558	0.298946	4.8	3.1	6
Биохимия																	0	0
ALT (U/L)	63.93	53.67	56.5	51.97	58.28	48.6	49.7	58.3	53.9	54.7	59.1	61.2	55.8208	4.59355	1.32604	55.6	48.6	63.93
AST (U/L)	66.93	66.83	69.9	52.7	47.67	53.3	63.9	66.2	55.3	62.1	60.9	63.6	60.7775	6.93842	2.00295	62.85	47.67	69.9
Glucose (mmol/L)	11.08	10.74	7.57	6.99	10.32	7.42	9.86	8.56	8.73	9.61	9.39	10.1	9.1975	1.34671	0.388763	9.5	6.99	11.08
Testosterone (nmol/L)	22.6	11.4	11.4	14.5	31.5	30.3	18.9	25.6	27.3	17.5	19.3	30.5	21.7333	7.3241	2.11429	20.95	11.4	31.5
